# Supplementary material
Source: PubMed Central journal article supplement (PMC3457432)
Supplement: JCM.01584-12_zjm999091978so1.pdf [file JCM.01584-12_zjm999091978so1.pdf]

---

|            |      |    |   |
|------------|------|----|---|
| ZJNB057A   | 2007 | 6  |   |
| A78        | 2009 | 7  |   |
| YN13B      | 2008 | 7  |   |
| 0911-037   | 2010 | 7  |   |
| 0911-065   | 2010 | 7  |   |
| xz202      | 2010 | 7  |   |
| 0911-065-2 | 2010 | 7  |   |
| 090843     | 2010 | 8  | + |
| HuN29      | 2010 | 9  |   |
| 26         | 2008 | 9  |   |
| A56        | 2009 | 9  |   |
| TL1        | 2006 | 9  |   |
| BB215-2    | 2006 | 9  |   |
| SH13       | 2010 | 10 | + |
| DL05       | 2010 | 10 | + |
| 111-3-1    | 2007 | 10 | + |
| 14         | 2007 | 10 | + |
| FJ107      | 2010 | 11 |   |
| HC39       | 2006 | 11 |   |
| GX3        | 2009 | 11 |   |
| AH091106   | 2010 | 11 |   |
| HN131      | 2007 | 11 |   |
| ZJNB141    | 2007 | 11 |   |
| NP4        | 2010 | 12 |   |
| HN106      | 2007 | 12 |   |
| 3283       | 2008 | 12 |   |
| SS1131     | 2008 | 13 |   |
| HZXS002    | 2006 | 13 |   |
| HZXS003    | 2006 | 13 |   |
| HN019      | 2006 | 13 |   |
| 482        | 2007 | 13 |   |
| 531        | 2008 | 13 |   |
| 534        | 2008 | 13 |   |
| 7172       | 2008 | 13 |   |
| 129-2      | 2007 | 13 |   |
| HuN27      | 2008 | 14 |   |
| RS53       | 2009 | 14 |   |
| 091120     | 2010 | 14 |   |
| GX36       | 2010 | 15 |   |
| SPB31      | 2006 | 15 |   |
| QZ511-1    | 2006 | 15 |   |
| TL23       | 2006 | 15 |   |
| HC30       | 2006 | 15 |   |

---

---

|          |      |    |   |
|----------|------|----|---|
| 17       | 2009 | 15 |   |
| ZJNB098  | 2007 | 15 |   |
| TL41     | 2006 | 16 |   |
| TL13     | 2006 | 16 |   |
| FL38-1   | 2006 | 16 |   |
| DDK10    | 2006 | 16 |   |
| HN143    | 2007 | 16 |   |
| HN148    | 2007 | 16 |   |
| HN017    | 2006 | 16 |   |
| HN156    | 2007 | 16 |   |
| HN108    | 2007 | 16 |   |
| HN3191   | 2007 | 16 |   |
| HN061A   | 2007 | 18 |   |
| ZJNB058A | 2007 | 18 |   |
| HN031    | 2007 | 18 |   |
| SC165    | 2010 | 19 | + |
| 090224   | 2010 | 20 |   |
| 090324   | 2010 | 20 |   |
| 090202   | 2010 | 20 |   |
| 8        | 2009 | 20 |   |
| FJ82     | 2010 | 22 |   |
| 090226   | 2010 | 22 |   |
| HN145    | 2007 | 22 |   |
| 7        | 2009 | 22 |   |
| 128-4-1  | 2007 | 22 |   |
| HC154-2  | 2006 | 23 | + |
| SS452    | 2007 | 23 | + |
| 31622    | 2007 | 23 | + |
| HT50     | 2010 | 24 |   |
| ZJNB099  | 2007 | 24 |   |
| HuNSF    | 2006 | 25 | + |
| 4-6      | 2008 | 26 |   |
| HT068    | 2010 | 26 |   |
| bs6      | 2010 | 26 |   |
| SC       | 2010 | 27 |   |
| HN142    | 2007 | 27 |   |
| HN146    | 2007 | 27 |   |
| HN152    | 2007 | 27 |   |
| ZJNB058C | 2007 | 27 |   |
| RC21     | 2006 | 28 |   |
| HC332    | 2006 | 28 |   |
| 6-4      | 2007 | 28 |   |
| HC5      | 2006 | 29 |   |

---

---

|          |      |                           |   |
|----------|------|---------------------------|---|
| 090416   | 2010 | 29                        |   |
| ZJNB063  | 2007 | 29                        |   |
| 07-SS-03 | 2010 | 30                        |   |
| ZJNB056B | 2007 | 30                        |   |
| HZXS4241 | 2007 | 30                        |   |
| 2623     | 2007 | 30                        |   |
| HNSQ006  | 2006 | 30                        |   |
| HNSQ005  | 2006 | 30                        |   |
| ZJNB065  | 2007 | 30                        |   |
| 1-23-1   | 2007 | 30                        |   |
| AH681    | 2007 | 30                        |   |
| HN151    | 2007 | 31                        |   |
| 9        | 2009 | 31                        |   |
| ZJNB066  | 2007 | 31                        |   |
| ZJNB071  | 2007 | 31                        |   |
| ZJNB072  | 2007 | 31                        |   |
| ZJNB123  | 2007 | 31                        |   |
| FJ125    | 2010 | 32                        |   |
| HN105    | 2007 | 32                        |   |
| RC41     | 2006 | 33                        |   |
| YN54     | 2010 | 34                        |   |
| HN062    | 2007 | 34                        |   |
| FL42     | 2006 | 1/2                       |   |
|          |      | 1\6\7\10\11\15\16\17\18\1 |   |
| 383      | 2008 | 9\20\22\23\24\26\30\31\34 |   |
|          |      | \1/2                      |   |
| SS39     | 2008 | 11\22\26\27\34            | + |
| 1        | 2008 | 13\23\24\25               |   |
| ZJYW024  | 2008 | 13\23\24\27\29            |   |
| ZJXS045  | 2007 | 23\27\29\31               |   |
| ZJXS039  | 2007 | 27\29\30\31               |   |
| ZJNB056C | 2007 | 4\15\16\31                |   |
| HN149    | 2007 | 4\7\13\17\23\24\25\27\29  |   |
| 7        | 2007 | 6\7\8\10\11\13\15\17\18\1 |   |
|          |      | 9\20\21\22\24\26          |   |
| HN154    | 2007 | acapsular                 |   |
| HN103    | 2007 | acapsular                 |   |
| ZJNB069  | 2007 | acapsular                 |   |
| HN144    | 2007 | acapsular                 | + |
| HN136    | 2007 | acapsular                 |   |
| HN351    | 2007 | acapsular                 |   |
| 2        | 2009 | acapsular                 |   |
| ZJNB058B | 2007 | acapsular                 |   |

---

|                                       |      |                   |    |   |   |   |   |   |   |   |
|---------------------------------------|------|-------------------|----|---|---|---|---|---|---|---|
| ZJNB059A                              | 2007 | acapsular         |    |   |   |   |   |   |   |   |
| 2-70                                  | 2007 | acapsular         |    |   |   |   |   |   |   |   |
| AH6112                                | 2007 | acapsular         |    |   |   |   |   |   |   |   |
| GX42                                  | 2010 | acapsular         |    |   |   |   |   |   |   |   |
| FJ150                                 | 2010 | acapsular         |    |   |   |   |   |   |   |   |
| RC24                                  | 2006 | acapsular         |    |   |   |   |   |   |   |   |
| bs53                                  | 2010 | acapsular         |    |   |   |   |   |   |   |   |
| WZ61-2                                | 2006 | acapsular         |    |   |   |   |   |   |   |   |
| FJ109                                 | 2010 | autoagglutinating |    |   |   |   |   |   |   |   |
| FJ162                                 | 2010 | autoagglutinating |    |   |   |   |   |   |   |   |
| BJ011                                 | 2010 | autoagglutinating |    |   |   |   |   |   |   |   |
| SC61                                  | 2010 | autoagglutinating |    |   |   |   |   |   |   |   |
| SC70                                  | 2010 | autoagglutinating |    |   |   |   |   |   |   |   |
| YN66                                  | 2010 | autoagglutinating |    |   |   |   |   |   |   |   |
| YN72                                  | 2010 | autoagglutinating |    |   |   |   |   |   |   |   |
| HeB41                                 | 2010 | autoagglutinating |    |   |   |   |   |   |   |   |
| HeB48                                 | 2010 | autoagglutinating |    |   |   |   |   |   |   |   |
| GX49                                  | 2010 | autoagglutinating |    |   |   |   |   |   |   |   |
| HuN6                                  | 2010 | autoagglutinating |    |   |   |   |   |   | + |   |
| ZJNB115                               | 2007 | autoagglutinating |    |   |   |   |   |   |   |   |
| ZJNB116B                              | 2008 | autoagglutinating |    |   |   |   |   |   |   |   |
| ZJXS052                               | 2008 | autoagglutinating |    |   |   |   |   |   |   |   |
| SS317                                 | 2008 | autoagglutinating |    |   |   |   |   |   |   |   |
| O25                                   | 2008 | autoagglutinating |    |   |   |   |   |   |   |   |
| ZJNB060C                              | 2007 | autoagglutinating |    |   |   |   |   |   |   |   |
| ZJNB060B                              | 2007 | autoagglutinating |    |   |   |   |   |   |   |   |
| HN155                                 | 2007 | autoagglutinating |    |   |   |   |   |   |   |   |
| HN031                                 | 2007 | autoagglutinating |    |   |   |   |   |   |   |   |
| HN021                                 | 2006 | autoagglutinating |    |   |   |   |   |   |   |   |
| ZJNB068                               | 2007 | autoagglutinating |    |   |   |   |   |   |   |   |
| NO. of the isolates in every serotype |      |                   | 12 | 4 | 5 | 1 | 4 | 1 | 3 | 1 |
