# Supplementary material
Source: PubMed Central journal article supplement (PMC3457432)
Supplement: JCM.01584-12_zjm999091978so2.pdf [file JCM.01584-12_zjm999091978so2.pdf]

TABLE S2. The primers to amplify 93 probes genes and the function of the translated proteins of genes

| Serotype     | Probe gene                  | Function of the translated proteins | Primer                  | Sequence               |
|--------------|-----------------------------|-------------------------------------|-------------------------|------------------------|
| 3            | <i>cps3E</i>                | polysaccharide biosynthesis         | <i>cps3E-1</i>          | CCTTTAGTTATCGTTTCAT    |
|              |                             |                                     | <i>cps3E-2</i>          | ATTCCTCGTAGAGTTTTTC    |
|              | <i>cps3F</i>                | filamentation                       | <i>cps3F-1</i>          | TTTCAACTCAAACCACAT     |
|              |                             |                                     | <i>cps3F-2</i>          | TCAATCCTAAAATACTCC     |
|              | <i>cps3G</i>                | aminotransferas                     | <i>cps3G-1</i>          | TACACCAAAGTGAGCAA      |
|              |                             |                                     | <i>cps3G-2</i>          | CTAGGGAGACATAAGCCA     |
|              | <i>cps3H</i>                | galactose phosphate transferase     | <i>cps3H-1</i>          | CGGTCATTATTCTGGTC      |
|              |                             |                                     | <i>cps3H-2</i>          | TGATATCCGCTTCTCT       |
|              | <i>cps3I</i>                | acetyltransferase                   | <i>cps3I-1</i>          | ATTGCTGAAAAAATGGC      |
|              |                             |                                     | <i>cps3I-2</i>          | GTAACAAGCGTGCTGGGT     |
|              | <i>cps3J</i>                | glycosyl transferase                | <i>cps3J-1</i>          | ACTGTAATGGTCGTTGC      |
|              |                             |                                     | <i>cps3J-2</i>          | TACTTTCTGCCTTCTCC      |
|              | <i>cps3K</i>                | flippase                            | <i>cps3K-1</i>          | ATGGTTGACTGAAGGAAT     |
|              |                             |                                     | <i>cps3K-2</i>          | AACTAAAGCCCCTAATC      |
| <i>cps3L</i> | polysaccharide biosynthesis | <i>cps3L-1</i>                      | AATCTTTATAGTGCAGCA      |                        |
|              |                             | <i>cps3L-2</i>                      | TTGAAAATCTCGTTGTAG      |                        |
| <i>cps3M</i> | nucleotidyltransferase      | <i>cps3M-1</i>                      | CGTAGCATGTGATAGAAAA     |                        |
|              |                             | <i>cps3M-2</i>                      | TAAGTAGAAAGCAAGCCTG     |                        |
| <i>cps3N</i> | UDP-glucose 6-dehydrogenase | <i>cps3N-1</i>                      | TGACAGGAATAAATAGGG      |                        |
|              |                             | <i>cps3N-2</i>                      | ACATCATCCAAGACAGAG      |                        |
| 4            | <i>cps4E</i>                | mannosyl-transferase                | <i>cps4E-1</i>          | ATTTAGAAACTGTTACCG     |
|              |                             |                                     | <i>cps4E-2</i>          | AATTGACAATGTCCGACT     |
|              | <i>cps4F</i>                | sugar transferases                  | <i>cps4F-1</i>          | AGATAGAATCAAGAAGAGGT   |
|              |                             |                                     | <i>cps4F-2</i>          | TCATTACTTTAAAATCAGAA   |
|              | <i>cps4G</i>                | aminotransferase                    | <i>cps4G-1</i>          | ATATTCCATTTTACCACCA    |
|              |                             |                                     | <i>cps4G-2</i>          | ACTCCACCTCTTCATCACTC   |
|              | <i>cps4H</i>                | glycosyl transferases               | <i>cps4H-1</i>          | TAAGTGTTTTAATGTCCGGTA  |
|              |                             |                                     | <i>cps4H-2</i>          | TTTTCTTGCAGCTTTGTAG    |
|              | <i>cps4I</i>                | glycosyltransferase                 | <i>cps4I-1</i>          | CGAGTTTTCTTCGTTTC      |
|              |                             |                                     | <i>cps4I-2</i>          | TTCCTCATAGTCAGCAATA    |
|              | <i>cps4J</i>                | N-acetyltransferase                 | <i>cps4J-1</i>          | TCTGATTATTATTTAACTCAAC |
|              |                             |                                     | <i>cps4J-2</i>          | GTCTACTATCACTATTCATTTT |
|              | <i>cps4K</i>                | polysaccharide polymerase           | <i>cps4K-1</i>          | GACTATCTGTATACCCAAAC   |
|              |                             |                                     | <i>cps4K-2</i>          | CTCCTTCCAAGTATTCTCTA   |
| <i>cps4L</i> | glycosyl transferases       | <i>cps4L-1</i>                      | TTGTAGTTGTTGATGGAAAAAGT |                        |
|              |                             | <i>cps4L-2</i>                      | GCCTCATCTCCTTAAAATAAGTG |                        |
| <i>cps4M</i> | flippase                    | <i>cps4M-1</i>                      | CAATAGTGAAGTCTGATAACGA  |                        |
|              |                             | <i>cps4M-2</i>                      | ATATAGAAGCTCCTACAAAAGT  |                        |
| <i>cps4N</i> | UDP-glucose/GDP-ma          | <i>cps4N-1</i>                      | ATATGAAAAGTTGAAAAGCGTC  |                        |

|              |                                        |                                        |                        |                        |
|--------------|----------------------------------------|----------------------------------------|------------------------|------------------------|
| 5            | <i>cps5E</i>                           | nnose dehydrogenases                   | <i>cps4N-2</i>         | AAGGTGGAACCATCTCTAAAG  |
|              |                                        | pseudogene                             | <i>cps5E-1</i>         | AGAACGCAACAGTAAACGAT   |
|              | <i>cps5F</i>                           | polysaccharide biosynthesis protein    | <i>cps5E-2</i>         | TCTGATACCCTGTGTAACGC   |
|              |                                        |                                        | <i>cps5F-1</i>         | AATCTTAGTAGTAGGTGCTGG  |
|              | <i>cps5G</i>                           | UDP-glucose lipid carrier transferase  | <i>cps5F-2</i>         | TAAATGAATTGACAATGTCCG  |
|              |                                        |                                        | <i>cps5G-1</i>         | GACCAAAGACAAAAGAGC     |
|              | <i>cps5H</i>                           | aminotransferase                       | <i>cps5G-2</i>         | TCAGATTAGTATGAAGCG     |
|              |                                        |                                        | <i>cps5H-1</i>         | ACAAACAATAAACCTGATGAA  |
|              | <i>cps5I</i>                           | glycosyl transferase                   | <i>cps5H-2</i>         | GAGGCAAGATGTAGACAGCAAT |
|              |                                        |                                        | <i>cps5I-1</i>         | TTTTCGTTGTATTTTCCAAA   |
|              | <i>cps5J</i>                           | acetyltransferase                      | <i>cps5I-2</i>         | TCCAAACATTATCCCCTATT   |
|              |                                        |                                        | <i>cps5J-1</i>         | TTTTAAGTGAGTTGGTTTC    |
|              | <i>cps5K</i>                           | glycosyl transferase                   | <i>cps5J-2</i>         | CATCAAGTACATTTGTTTC    |
|              |                                        |                                        | <i>cps5K-1</i>         | ATTTGTCTGTGCTCTGTTGAAG |
|              | <i>cps5L</i>                           | glycosyl transferase                   | <i>cps5K-2</i>         | CCATTGATCTGTATCTCCTCT  |
|              |                                        |                                        | <i>cps5L-1</i>         | GTGGGAGCATTCTTTAT      |
|              | <i>cps5M</i>                           | oligosaccharide repeat unit polymerase | <i>cps5L-2</i>         | CCTTTTCCTCACATTTG      |
|              |                                        |                                        | <i>cps5M-1</i>         | ATTTGGTGACTATTGGTG     |
|              | <i>cps5N</i>                           | acetyltransferase                      | <i>cps5M-2</i>         | TCATTTTTTCATTGGGGG     |
|              |                                        |                                        | <i>cps5N-1</i>         | ATGACTAATAATAAGCAACT   |
| <i>cps5O</i> | flippase                               | <i>cps5N-2</i>                         | AAAAGAGATAGAACAGATAA   |                        |
|              |                                        | <i>cps5O-1</i>                         | GCTATCTGTTATGTGACTGTAT |                        |
| <i>cps5P</i> | acetyltransferase                      | <i>cps5O-2</i>                         | ATCTTCTTAATCTTGCTTCTA  |                        |
|              |                                        | <i>cps5P-1</i>                         | AAGCATTATCGTCTTGAACA   |                        |
| <i>cps5Q</i> | epimerase                              | <i>cps5P-2</i>                         | CTGAAACCAAAATCTCTCTC   |                        |
|              |                                        | <i>cps5Q-1</i>                         | ATGAAAAAATCGCCGTC      |                        |
| <i>cps5R</i> | dehydrogenase                          | <i>cps5Q-2</i>                         | GGAACCATCTCTAAAAGT     |                        |
|              |                                        | <i>cps5R-1</i>                         | ATGAAAAAATCGCCGTC      |                        |
| 8            | <i>cps8E</i>                           | galactosyl transferase                 | <i>cps5R-2</i>         | GGAACCATCTCTAAAAGT     |
|              |                                        |                                        | <i>cps8E-1</i>         | GCCGTATTTTTTGCTGTATT   |
| <i>cps8F</i> | UDP-galactopyranose mutase             | <i>cps8E-2</i>                         | CCTTTTTTGACTCGGTGTAT   |                        |
|              |                                        | <i>cps8F-1</i>                         | ATCTGTTCCGAGCGGTCT     |                        |
| <i>cps8G</i> | UDP-N-acetyl-D-mannosamine transferase | <i>cps8F-2</i>                         | GGCTTGTTCTTCCAAGTT     |                        |
|              |                                        | <i>cps8G-1</i>                         | ATGATTGATGAGTTCTTT     |                        |
| <i>cps8H</i> | phosphotransferase                     | <i>cps8G-2</i>                         | CTTTTGTTGTTCTGCGAG     |                        |
|              |                                        | <i>cps8H-1</i>                         | GGTGCTTCAGTTGTTCTA     |                        |
| <i>cps8I</i> | rhamnosyl transferase                  | <i>cps8H-2</i>                         | TTTCTTCTTTCTTTGC       |                        |
|              |                                        | <i>cps8I-1</i>                         | AAACGCTGTTAGATGCTG     |                        |
| <i>cps8J</i> | polysaccharide polymerase              | <i>cps8I-2</i>                         | TGATGCGATTTTTTATTC     |                        |
|              |                                        | <i>cps8J-1</i>                         | GCGAGCGGTAATAATGTTGG   |                        |
| <i>cps8K</i> | UDP-N-acetylglucosamine 2-epimerase    | <i>cps8J-2</i>                         | TACTCCGTTCTCTTGAATG    |                        |
|              |                                        | <i>cps8K-1</i>                         | ATCTGTTGTAATGGTCGC     |                        |
| <i>cps8L</i> | polysaccharide                         | <i>cps8K-2</i>                         | CTATTCCTCTTGGTGTGA     |                        |
|              |                                        | <i>cps8L-1</i>                         | ATAAAGAAATGTGGCAAC     |                        |

|               |                                           |                                      |                       |                      |
|---------------|-------------------------------------------|--------------------------------------|-----------------------|----------------------|
| 10            | <i>cps8M</i>                              | biosynthesis protein                 | <i>cps8L-2</i>        | CATCATCAGAAAGTAGGA   |
|               |                                           | flippase                             | <i>cps8M-1</i>        | TTCATTTTGGATGGTGTG   |
|               | <i>cps8N</i>                              | UDP-galactopyranose<br>mutase        | <i>cps8M-2</i>        | CGTTCTCAGAAGATTCTT   |
|               |                                           |                                      | <i>cps8N-1</i>        | ACCGCTATACAAACACACC  |
|               | <i>cps10E</i>                             | polysaccharide<br>biosynthesis       | <i>cps8N-2</i>        | ACTTCATTTCTCGCACACT  |
|               |                                           |                                      | <i>cps10E-1</i>       | GGCTGTTTTTGGATGTTAT  |
|               | <i>cps10F</i>                             | glycosyl-1-phosphate-t<br>ransferase | <i>cps10E-2</i>       | TGTCCGACTGCTTATTTGT  |
|               |                                           |                                      | <i>cps10F-1</i>       | TATGCCGACTCATCTTTT   |
|               | <i>cps10G</i>                             | UDP-glucose<br>4-epimerase           | <i>cps10F-2</i>       | CCTTTTTTATGTTCCCTG   |
|               |                                           |                                      | <i>cps10G-1</i>       | AGTATTGATAACTGGTGCT  |
|               | <i>cps10H</i>                             | glycosyltransferase                  | <i>cps10G-2</i>       | TATATTCGCTGTTCTGAGG  |
|               |                                           |                                      | <i>cps10H-1</i>       | ATTATTTTTCTCACCTGCT  |
|               | <i>cps10I</i>                             | O-acetyl transferase                 | <i>cps10H-2</i>       | TTTCAACGTCAAACCTATC  |
|               |                                           |                                      | <i>cps10I-1</i>       | CGTTTTAAGATGTTTGGCAC |
|               | <i>cps10J</i>                             | glycosyl transferase                 | <i>cps10I-2</i>       | TCACTGAATAGTCGGGGTA  |
|               |                                           |                                      | <i>cps10J-1</i>       | ACTAATCAATCAAGAAAATG |
|               | <i>cps10K</i>                             | glycosyl transferase                 | <i>cps10J-2</i>       | ATGAAAAAATAGAAGAAACC |
|               |                                           |                                      | <i>cps10K-1</i>       | ATGGATGGACAAATGAAGAA |
|               | <i>cps10L</i>                             | glycosyl transferase                 | <i>cps10K-2</i>       | CCAAACTAGCAAAAAGAGAA |
|               |                                           |                                      | <i>cps10L-1</i>       | ATCTTTATTTGCTGGTCA   |
| <i>cps10M</i> | oligosaccharide repeat<br>unit polymerase | <i>cps10L-2</i>                      | CCGTATTTATTCTTTTCA    |                      |
|               |                                           | <i>cps10M-1</i>                      | CAATACTATCACTACCACGG  |                      |
| <i>cps10N</i> | NAD-dependent<br>epimerase/dehydratase    | <i>cps10M-2</i>                      | ATTCCAACACTAATCAAAAC  |                      |
|               |                                           | <i>cps10N-1</i>                      | CGAGGTTGTCAGGTTGTT    |                      |
| <i>cps10O</i> | acetyltransferase                         | <i>cps10N-2</i>                      | TGAAAGGGATTCTGGTTG    |                      |
|               |                                           | <i>cps10O-1</i>                      | TATGGTTGTTTTACAGAAGG  |                      |
| <i>cps10P</i> | flippase                                  | <i>cps10O-2</i>                      | TGAAGATAATTGATCAGGTT  |                      |
|               |                                           | <i>cps10P-1</i>                      | CGATTACTTAGTCCATACGA  |                      |
| <i>cps10Q</i> | glycerophosphotransfe<br>rase             | <i>cps10P-2</i>                      | AATAAAAACAAAACCTGCTGC |                      |
|               |                                           | <i>cps10Q-1</i>                      | CATCAAGAAAAACAAGAAT   |                      |
| <i>cps10R</i> | cytidylyltransferase                      | <i>cps10Q-2</i>                      | CAATGAACGAACTACAATA   |                      |
|               |                                           | <i>cps10R-1</i>                      | ACTTTTGAATTTACTCCACT  |                      |
| 19            | <i>cps19E</i>                             | polysaccharide<br>biosynthesis       | <i>cps10R-2</i>       | AATTACTTCTACACCTTCT  |
|               |                                           |                                      | <i>cps19E-1</i>       | GGCTGTTTTTGGATGTTAT  |
|               | <i>cps19F</i>                             | filamentation                        | <i>cps19E-2</i>       | GTAGAGTTTCTCGCCTGGT  |
|               |                                           |                                      | <i>cps19F-1</i>       | TTTCAACTCAAACCACAT   |
|               | <i>cps19G</i>                             | sugar transferases                   | <i>cps19F-2</i>       | TCAACCCTAAAATACTCC   |
|               |                                           |                                      | <i>cps19G-1</i>       | GTCAAGAAAGAGTTACAAGA |
|               | <i>cps19H</i>                             | aminotransferase                     | <i>cps19G-2</i>       | AATCAGAAATAATTCCAAAG |
|               |                                           |                                      | <i>cps19H-1</i>       | CCAAGCTGAAATTGATGAA  |
|               | <i>cps19I</i>                             | acetyltransferase                    | <i>cps19H-2</i>       | TGTAGGCTGTGAGAAGAGG  |
|               |                                           |                                      | <i>cps19I-1</i>       | TTGGTTTTTTAGCGTATTCT |
|               | <i>cps19J</i>                             | sugar transferases                   | <i>cps19I-2</i>       | CATTCATTTTGCACCTTCT  |
|               |                                           |                                      | <i>cps19J-1</i>       | ATGAAATACATGGGGCGG   |

|    |                                                     |          |                        |
|----|-----------------------------------------------------|----------|------------------------|
|    |                                                     | cps19J-2 | AACAAGCAAAGGAAGGGC     |
|    | <i>cps19K</i> sugar transferases                    | cps19K-1 | GACAAGAAATCAATCAAATG   |
|    |                                                     | cps19K-2 | CTGGTCTACAACTACAGGC    |
|    | <i>cps19L</i> polysaccharide biosynthesis           | cps19L-1 | TCGAAGCATGAAAAAAAA     |
|    |                                                     | cps19L-2 | TCCATAACCAAACAAAGG     |
|    | <i>cps19M</i> acetyltransferase                     | cps19M-1 | GTGGTATTTTCTTGCGATT    |
|    |                                                     | cps19M-2 | ATGAGGTGGAACATTTTTA    |
|    | <i>cps19N</i> flippase Wzx                          | cps19N-1 | CACAAACAAGTAGGAAATGC   |
|    |                                                     | cps19N-2 | TAAAACCAAACCAAAGAATC   |
|    | <i>cps19O</i> sugar transferases                    | cps19O-1 | ATTAACCAAATAGACAACAC   |
|    |                                                     | cps19O-2 | ATATCCAATCTCCTAACAAAG  |
|    | <i>cps19P</i> acetyltransferase                     | cps19P-1 | TGAAAAATATATCCACGCA    |
|    |                                                     | cps19P-2 | TCAAAAAATAAACCATCCC    |
|    | <i>cps19Q</i> epimerase                             | cps19Q-1 | GCAGAAGAGAAGCGGAAG     |
|    |                                                     | cps19Q-2 | TGAGTGTGGTAGAGGGGC     |
|    | <i>cps19R</i> dehydrogenase                         | cps19R-1 | CTATCTACCGTCAATTCCTC   |
|    |                                                     | cps19R-2 | ATAATCACTTTTGCCCCTT    |
| 23 | <i>cps23E</i> mannosyl-transferase                  | cps23E-1 | GGCTGTTTTGGATGTTATTA   |
|    |                                                     | cps23E-2 | CCGATTTCTTCCTCTGTATGT  |
|    | <i>cps23F</i> sugar transferases                    | cps23F-1 | GAAGAATGAAGCAACCAG     |
|    |                                                     | cps23F-2 | TAAAAGTAACGTCGCAAA     |
|    | <i>cps23G</i> glycosyl transferase                  | cps23G-1 | ATCCATTTTACCACCAGA     |
|    |                                                     | cps23G-2 | TCCAAAGTAAAGCCTTCCAG   |
|    | <i>cps23H</i> glycosyl transferases                 | cps23H-1 | TCAATCAACCGATAATACAAAG |
|    |                                                     | cps23H-2 | CAAGCTAAAACATGAAACACAC |
|    | <i>cps23I</i> glycosyl transferase                  | cps23I-1 | GTATCAGTAATAATGTCTTGGC |
|    |                                                     | cps23I-2 | ACTCCACAGTTCTACATCTCTT |
|    | <i>cps23J</i> O-antigen polymerase                  | cps23J-1 | GCTATCAGGAATACACAAAG   |
|    |                                                     | cps23J-2 | AGTGGAAATAACAACAAAAAT  |
|    | <i>cps23K</i> polysaccharide pyruvyl transferase    | cps23K-1 | GGTATCTCGTATTGATTTGAC  |
|    |                                                     | cps23K-2 | GACCCTGATTACTCTGTTTTT  |
|    | <i>cps23L</i> acetylglucosaminyltransferase         | cps23L-1 | GAAAGAAGCAATAGAAAGCAT  |
|    |                                                     | cps23L-2 | TCTCTGAAAAATAACAACCTG  |
|    | <i>cps23M</i> flippase Wzx                          | cps23M-1 | GCTTGGTCTGAATAACTACGGT |
|    |                                                     | cps23M-2 | CAAGGAAACATTGTGAAACTCT |
|    | <i>cps23N</i> UDP-glucose/GDP-mannose dehydrogenase | cps23N-1 | GTCCGGTCTATCTATCGCTGT  |
|    |                                                     | cps23N-2 | AATAATCACTTTTGCCCCTT   |
| 25 | <i>cps25E</i> glucosephosphotransferase WchA        | cps25E-1 | GGCATCTTATCTATTTTCG    |
|    |                                                     | cps25E-2 | CAACTTTCACTGTCTTCAA    |
|    | <i>cps25F</i> beta-1,4-galactosyltransferase        | cps25F-1 | TTGTTTAGTAGGCTCTTCTG   |
|    |                                                     | cps25F-2 | TTCTATGTACACTGTTTTTG   |
|    | <i>cps25G</i> ss-1,4-galactosyltransferase          | cps25G-1 | GATTTTTGTGACTGTGGG     |
|    |                                                     | cps25G-2 | TTCGGTAACTTCTCGTGT     |
|    | <i>cps25H</i> putative                              | cps25H-1 | GGTCCTGTCTCCTAAAAAA    |

---

|               |                        |          |                       |
|---------------|------------------------|----------|-----------------------|
|               | phosphotransferase     | cps25H-2 | CCCAACTGAATAAATCCCA   |
| <i>cps25I</i> | sugar transferases     | cps25I-1 | CTAACTGAGAGAATAGGTGG  |
|               |                        | cps25I-2 | TCGTTTTTTGAATAGAGAAT  |
| <i>cps25J</i> | Beta-1,3-glucosyltrans | cps25J-1 | GGATAAGATAAGTGTCATTG  |
|               | ferase                 | cps25J-2 | ACAGTTTGTAAAGTTTCATT  |
| <i>cps25K</i> | acetyltransferase      | cps25K-1 | CCTCGATTTCTAATCCTCT   |
|               |                        | cps25K-2 | CTGGTACATCTTTCGTCAC   |
| <i>cps25L</i> | acetyltransferase      | cps25L-1 | TACTGGAAATTTATTATGCT  |
|               |                        | cps25L-2 | ACTCTTCGTTACAACCTGCTC |
| <i>cps25M</i> | oligosaccharide repeat | cps25M-1 | TTAGTTTCCCTTTTTTGGT   |
|               | unit polymerase        | cps25M-2 | AGGTTAATGCATTATCCGT   |
| <i>cps25N</i> | glycerophosphotransfe  | cps25N-1 | GATGCGGTTTATGTTATTGAT |
|               | rase                   | cps25N-2 | TTGTGTATATTTCTCCTCGGT |
| <i>cps25O</i> | flippase               | cps25O-1 | TCAGAGAAAATAGAGAAAAA  |
|               |                        | cps25O-2 | TAGCCTACTGTAGAGAGAAC  |

---
