# Supplementary material
Source: PubMed Central journal article supplement (PMC3457432)
Supplement: JCM.01584-12_zjm999091978so3.pdf [file JCM.01584-12_zjm999091978so3.pdf]

TABLE S3. Hybridization of parts of *cps* genes in serotypes 3, 4, 5, 8, 10, 19, 23 and 25 with chromosomal DNA of *S. suis* serotypes

| DNA probes | <i>Streptococcus suis</i> serotypes |   |   |   |   |   |   |   |   |    |    |    |    |    |    |    |    |    |    |    |    |    |    |    |    |    |    |    |    |    |    |    |     |   |   |
|------------|-------------------------------------|---|---|---|---|---|---|---|---|----|----|----|----|----|----|----|----|----|----|----|----|----|----|----|----|----|----|----|----|----|----|----|-----|---|---|
|            | 1                                   | 2 | 3 | 4 | 5 | 6 | 7 | 8 | 9 | 10 | 11 | 12 | 13 | 14 | 15 | 16 | 17 | 18 | 19 | 20 | 21 | 22 | 23 | 24 | 25 | 26 | 27 | 28 | 29 | 30 | 31 | 33 | 1/2 |   |   |
| cps3E      | -                                   | - | + | + | + | - | - | - | + | -  | +  | +  | -  | -  | -  | +  | +  | -  | -  | +  | -  | +  | -  | -  | +  | -  | +  | +  | +  | -  | +  | -  | -   |   |   |
| cps3F      | -                                   | - | + | - | - | + | - | - | - | -  | -  | -  | +  | -  | -  | -  | +  | +  | +  | -  | -  | -  | -  | -  | -  | -  | -  | -  | -  | +  | -  | -  | -   | - |   |
| cps3G      | -                                   | - | + | - | - | - | - | - | + | +  | -  | -  | -  | -  | -  | -  | -  | -  | +  | +  | -  | -  | -  | -  | -  | -  | -  | -  | -  | +  | +  | +  | +   | - |   |
| cps3H      | -                                   | - | + | - | - | - | - | - | - | -  | -  | -  | -  | -  | -  | -  | -  | -  | -  | -  | -  | -  | -  | -  | -  | -  | -  | -  | -  | -  | -  | -  | -   | - |   |
| cps3I      | -                                   | - | + | - | - | - | - | - | - | -  | -  | -  | -  | -  | -  | -  | -  | -  | -  | -  | -  | -  | -  | -  | -  | -  | -  | -  | -  | -  | -  | -  | -   | - |   |
| cps3J      | -                                   | - | + | - | - | - | - | - | - | -  | -  | -  | -  | -  | -  | -  | -  | -  | -  | -  | -  | -  | -  | -  | -  | -  | -  | -  | -  | -  | -  | -  | -   | - |   |
| cps3K      | -                                   | - | + | - | - | - | - | - | - | -  | -  | -  | -  | -  | -  | -  | -  | -  | -  | -  | -  | -  | -  | -  | -  | -  | -  | -  | -  | -  | -  | -  | -   | - |   |
| cps3L      | -                                   | - | + | - | - | - | - | - | - | -  | -  | -  | -  | -  | -  | -  | -  | -  | -  | -  | -  | -  | -  | -  | -  | -  | -  | -  | -  | -  | -  | -  | -   | - |   |
| cps3M      | -                                   | - | + | - | - | - | - | - | - | -  | -  | -  | -  | -  | -  | -  | +  | -  | -  | -  | -  | -  | -  | -  | -  | -  | -  | -  | -  | -  | -  | -  | -   | - |   |
| cps3N      | -                                   | - | + | + | + | - | + | - | - | -  | -  | -  | +  | -  | -  | -  | +  | +  | +  | -  | -  | -  | +  | -  | -  | +  | -  | -  | -  | -  | -  | -  | -   | - | - |
| cps4E      | -                                   | - | + | + | + | - | + | - | + | -  | +  | +  | -  | -  | -  | -  | +  | +  | +  | -  | +  | -  | +  | +  | -  | -  | -  | -  | -  | +  | +  | +  | -   | - |   |
| cps4F      | -                                   | - | - | + | + | - | + | - | - | -  | -  | -  | -  | -  | -  | -  | -  | -  | -  | -  | -  | -  | +  | -  | -  | -  | -  | -  | -  | -  | -  | -  | -   | - |   |
| cps4G      | -                                   | - | - | + | + | - | + | - | - | -  | -  | -  | -  | -  | -  | -  | -  | -  | -  | -  | -  | -  | +  | -  | -  | -  | -  | -  | -  | -  | -  | -  | -   | - |   |
| cps4H      | -                                   | - | - | + | + | + | - | + | + | -  | -  | -  | -  | +  | +  | +  | -  | ±  | -  | -  | -  | -  | -  | -  | -  | -  | -  | -  | -  | -  | -  | -  | -   | - |   |
| cps4I      | -                                   | ± | - | + | + | + | - | - | - | -  | -  | -  | -  | ±  | ±  | ±  | -  | -  | -  | -  | -  | -  | -  | -  | -  | -  | -  | -  | -  | -  | -  | -  | +   | - |   |
| cps4J      | -                                   | - | - | + | + | - | - | - | - | -  | -  | -  | ±  | -  | -  | -  | -  | -  | -  | -  | -  | -  | -  | -  | -  | -  | -  | -  | -  | -  | -  | -  | -   | - |   |
| cps4K      | -                                   | - | - | + | + | + | - | - | - | -  | -  | +  | -  | -  | -  | -  | -  | -  | -  | -  | -  | +  | -  | -  | -  | -  | -  | -  | -  | -  | -  | -  | -   | - |   |
| cps4L      | -                                   | - | - | + | - | - | - | - | - | -  | -  | -  | -  | -  | -  | -  | -  | -  | -  | -  | -  | -  | -  | -  | -  | -  | -  | -  | -  | -  | -  | -  | -   | - |   |
| cps4M      | -                                   | - | - | + | - | - | - | - | - | -  | -  | -  | -  | -  | -  | -  | -  | -  | -  | -  | -  | -  | -  | -  | -  | -  | -  | -  | -  | -  | -  | -  | -   | - |   |
| cps4N      | -                                   | - | + | + | + | - | + | - | - | -  | -  | -  | +  | -  | -  | -  | -  | +  | +  | -  | -  | -  | +  | ±  | -  | +  | -  | -  | -  | -  | -  | -  | -   | - |   |
| cps5E      | -                                   | - | - | - | + | - | - | - | + | -  | -  | -  | -  | -  | -  | -  | +  | -  | +  | +  | -  | -  | -  | -  | -  | -  | -  | -  | -  | +  | +  | +  | -   | - |   |
| cps5F      | -                                   | - | + | - | + | + | + | - | - | +  | +  | -  | +  | -  | +  | -  | +  | +  | +  | -  | -  | -  | -  | -  | -  | -  | +  | -  | +  | +  | +  | -  | +   | - |   |

|        |   |   |   |   |   |   |   |   |   |   |   |   |   |   |   |   |   |   |   |   |   |   |   |   |   |   |   |   |   |   |   |   |
|--------|---|---|---|---|---|---|---|---|---|---|---|---|---|---|---|---|---|---|---|---|---|---|---|---|---|---|---|---|---|---|---|---|
| cps5G  | - | - | - | + | + | - | - | - | + | - | + | - | - | - | - | - | - | + | + | - | - | + | - | - | + | - | - | - | - | + | - | - |
| cps5H  | - | - | - | + | + | + | + | - | - | - | - | - | - | - | - | - | - | + | + | - | - | - | + | - | - | - | - | - | - | - | - | - |
| cps5I  | - | - | - | - | + | - | - | - | - | - | - | - | - | - | - | - | - | - | - | - | - | - | - | - | - | - | - | - | - | - | - |   |
| cps5J  | - | - | - | - | + | - | - | - | - | - | - | - | - | - | - | - | - | - | - | - | - | - | - | - | - | - | - | - | - | - | - |   |
| cps5K  | - | - | - | - | + | - | - | - | - | - | - | - | + | - | - | + | - | + | - | - | - | - | - | - | - | - | - | - | - | - | - |   |
| cps5L  | - | - | - | + | + | - | - | - | - | - | - | - | + | - | - | - | - | - | - | - | - | + | + | - | - | - | - | - | - | - | - |   |
| cps5M  | - | - | - | + | + | - | - | - | - | - | - | - | - | - | - | - | - | - | - | - | - | - | - | - | + | - | - | - | - | - | - |   |
| cps5N  | - | - | - | - | + | - | - | - | - | - | - | - | - | - | - | - | - | - | - | - | - | - | - | - | - | - | - | - | - | - | - |   |
| cps5O  | - | - | - | - | + | - | - | - | - | - | - | + | + | - | - | - | - | - | - | - | - | - | - | - | - | - | - | - | - | - | - |   |
| cps5P  | - | - | - | - | + | - | - | - | - | - | - | - | - | - | - | - | - | - | - | - | - | - | - | - | - | - | - | - | - | - | - |   |
| cps5Q  | - | - | + | + | + | - | + | + | + | - | - | + | + | + | - | + | - | + | - | + | + | + | - | - | - | - | - | - | - | - | - |   |
| cps5R  | - | - | + | + | + | - | + | + | + | + | - | - | + | - | - | + | - | + | + | + | - | - | + | - | - | - | - | - | - | - | - |   |
| cps8E  | - | - | - | - | - | - | + | - | - | - | - | - | - | - | - | - | - | - | - | - | - | - | - | + | - | - | - | - | - | + | - |   |
| cps8F  | - | + | - | - | + | + | - | + | - | + | + | - | + | ± | - | + | + | ± | - | + | - | - | - | - | + | - | + | - | - | + | - |   |
| cps8G  | - | + | - | - | + | + | - | + | - | + | + | - | + | + | - | + | + | + | - | + | + | - | - | - | + | - | + | - | - | + | - |   |
| cps8H  | - | - | - | - | - | - | + | - | - | - | - | - | - | - | - | - | - | - | - | - | - | - | - | - | - | - | - | - | - | - | - |   |
| cps8I  | - | - | - | - | - | - | + | - | - | - | - | - | - | - | - | - | - | - | - | - | - | - | - | - | - | - | - | - | - | - | - |   |
| cps8J  | - | - | - | - | - | - | + | - | - | - | - | - | - | - | - | - | - | - | - | - | - | - | - | - | - | - | - | - | - | - | - |   |
| cps8K  | - | - | - | - | - | - | + | - | - | - | - | - | - | - | - | - | - | - | - | - | - | - | - | - | - | - | - | - | - | - | - |   |
| cps8L  | - | - | - | - | - | - | + | - | - | - | - | - | - | - | - | - | - | - | - | - | - | - | - | - | - | - | - | - | - | - | - |   |
| cps8M  | - | - | - | - | - | ± | - | + | - | - | - | - | - | - | - | - | - | - | - | - | - | - | - | - | - | - | - | - | - | - | - |   |
| cps8N  | - | - | - | - | + | + | - | + | + | + | + | - | - | - | - | + | - | - | + | - | - | - | - | - | - | - | - | - | - | - | - |   |
| cps10E | - | - | + | + | + | + | + | - | - | + | + | + | + | - | - | + | + | + | + | - | + | - | + | + | - | + | - | + | + | + | + |   |
| cps10F | - | - | - | - | + | - | - | - | - | + | - | - | - | - | - | + | + | - | - | - | - | - | - | - | - | - | - | + | - | - | - |   |
| cps10G | - | - | - | - | + | - | - | - | - | + | - | - | - | - | ± | + | + | ± | - | - | - | - | - | - | - | - | - | - | - | - | - |   |
| cps10H | - | + | + | + | + | - | + | + | - | + | - | + | + | + | + | + | + | + | + | + | - | - | ± | ± | - | - | - | - | - | - | + |   |

---

|        |   |   |   |   |   |   |   |   |   |   |   |   |   |   |   |   |   |   |   |   |   |   |   |   |   |   |   |   |   |   |   |   |   |   |   |   |   |   |
|--------|---|---|---|---|---|---|---|---|---|---|---|---|---|---|---|---|---|---|---|---|---|---|---|---|---|---|---|---|---|---|---|---|---|---|---|---|---|---|
| cps10I | - | - | - | - | + | - | - | - | - | + | - | - | - | - | + | + | + | - | - | - | - | - | - | - | - | - | - | - | - | - | - | - | - | - | - | - | - |   |
| cps10J | - | - | - | - | - | - | - | - | - | + | - | - | - | - | - | + | + | - | - | - | - | - | - | - | - | - | - | - | - | - | - | - | - | - | - | - | - |   |
| cps10K | - | - | - | - | - | - | - | - | - | + | - | - | - | - | - | + | + | - | - | - | - | - | - | - | - | - | - | - | - | - | - | - | - | - | - | - | - | - |
| cps10L | - | - | - | - | - | + | + | - | - | + | - | - | - | - | - | + | + | - | - | - | - | - | - | - | - | - | - | - | - | - | - | - | - | - | - | - | - | - |
| cps10M | - | - | - | - | - | - | - | - | - | + | - | - | - | - | - | - | - | - | - | - | - | - | - | - | - | - | - | - | - | - | - | - | - | - | - | - | - | - |
| cps10N | - | - | - | - | - | - | - | - | - | + | - | - | - | - | - | - | - | - | - | - | - | - | - | - | - | - | - | - | - | - | - | - | - | - | - | - | - | - |
| cps10O | - | - | - | - | - | - | - | - | - | + | + | - | - | - | - | - | - | - | - | - | - | - | - | - | - | - | - | - | - | - | - | - | - | - | - | - | - | - |
| cps10P | - | - | - | - | + | + | - | - | - | + | + | - | - | - | - | - | - | - | - | - | - | - | - | - | - | - | - | - | - | - | - | - | - | - | - | - | - | - |
| cps10Q | - | - | - | - | - | - | - | - | - | + | - | - | - | - | - | - | - | - | - | - | - | - | - | - | - | - | - | - | - | - | - | - | - | - | - | - | - | - |
| cps10R | - | - | - | - | - | - | - | - | - | + | - | - | - | - | - | - | - | - | - | - | - | - | - | - | - | - | - | - | - | - | - | - | - | - | - | - | - | - |
| cps19E | - | - | - | + | + | + | + | + | + | + | - | - | - | - | - | + | + | + | - | - | - | - | - | - | - | + | - | + | - | - | + | - | - | - | - | - | - |   |
| cps19F | - | - | - | - | - | - | - | - | - | - | - | - | + | - | - | - | + | + | - | - | - | - | - | - | - | - | - | - | - | - | - | - | - | - | - | - | - | - |
| cps19G | - | - | - | - | - | - | - | - | - | - | - | - | - | - | - | + | - | + | - | - | - | - | - | - | - | - | - | - | - | - | - | - | - | - | - | - | - | - |
| cps19H | - | - | - | - | + | - | - | - | - | - | - | - | - | - | - | + | + | - | + | - | - | - | - | - | - | - | - | - | - | - | - | - | - | - | - | - | - | - |
| cps19I | - | - | - | - | - | - | - | - | - | - | - | - | - | - | - | - | - | + | - | - | - | - | - | - | - | - | - | - | - | - | - | - | - | - | - | - | - | - |
| cps19J | - | - | - | - | + | + | - | - | + | - | + | - | - | - | - | - | - | + | + | - | - | - | - | - | - | - | - | - | - | + | - | - | + | - | - | + | - | - |
| cps19K | - | - | - | - | - | - | - | - | - | - | - | - | - | - | - | - | - | - | + | - | - | - | - | - | - | - | ± | - | - | - | - | - | - | - | - | - | - | - |
| cps19L | - | - | - | - | - | - | - | - | - | - | - | - | - | - | - | - | - | - | + | - | - | - | - | - | - | - | - | - | - | - | - | - | - | - | - | - | - | - |
| cps19M | - | - | - | - | - | - | - | - | - | - | - | - | - | - | - | - | - | - | + | - | - | - | - | - | - | - | - | - | - | - | - | - | - | - | - | - | - | - |
| cps19N | - | - | - | - | - | - | - | - | - | - | - | - | - | - | - | - | - | - | + | - | - | - | - | - | - | - | - | - | - | - | - | - | - | - | - | - | - | - |
| cps19O | - | - | - | - | - | - | - | - | - | - | - | - | - | - | - | - | - | - | + | - | - | - | - | - | - | - | - | - | - | - | - | - | - | - | - | - | - | - |
| cps19P | - | - | - | - | - | - | - | - | - | - | - | - | - | - | - | - | - | - | + | - | - | - | - | - | - | - | - | - | + | - | - | - | - | - | - | - | - | - |
| cps19Q | - | - | - | - | + | - | - | - | - | - | - | - | - | - | - | - | - | - | + | - | - | - | - | - | - | - | - | - | - | - | - | - | - | - | - | - | - | - |
| cps19R | - | - | + | - | - | - | - | - | - | - | - | - | - | - | - | - | - | + | + | - | - | - | - | - | - | - | + | - | - | - | - | - | - | - | - | - | - | - |
| cps23E | - | - | + | - | - | - | + | - | - | - | + | - | - | - | - | - | + | + | + | - | - | - | + | + | - | + | - | + | - | + | - | + | - | - | + | - | - | - |
| cps23F | - | - | - | - | - | + | - | - | - | - | - | - | - | - | - | - | + | - | - | - | - | - | - | + | - | - | - | - | - | - | - | - | - | - | - | - | - | - |

---
